# Supplementary material for: Spatiotemporal Characteristics of Winter Wheat Waterlogging in the Middle and Lower Reaches of the Yangtze River, China
Source: Hindawi journal article supplement (doi:10.1155/2018/3542103), 2018-01-01
Supplement: f1 [file 3542103.f1.zip]

Archive with 2 entries (2 files):
- 3542103.f1.eps
- 3542103.f2.eps
